# Supplementary material for: Lisocabtagene maraleucel as second-line therapy for large B-cell lymphoma: primary analysis of the phase 3 TRANSFORM study
Source: PubMed Central journal article supplement — Blood. 2022 Dec 23;141(14):1675–84. doi: 10.1182/blood.2022018730 (PMC10646768; doi:10.1182/blood.2022018730), 2022-12-23
Supplement: BLOOD_BLD-2022-018730-mmc1.pdf [file BLOOD_BLD-2022-018730-mmc1.pdf]

**Supplementary Appendix**

**Lisocabtagene maraleucel as second-line therapy for large B-cell lymphoma: primary analysis of phase 3 TRANSFORM study**

Jeremy S. Abramson, Scott R. Solomon, Jon Arnason, et al.

**Table of contents**

|                                                                                                                                            |    |
|--------------------------------------------------------------------------------------------------------------------------------------------|----|
| List of study sites .....                                                                                                                  | 3  |
| STATISTICAL ANALYSES.....                                                                                                                  | 6  |
| Hierarchical testing strategy .....                                                                                                        | 6  |
| SUBGROUP ANALYSES.....                                                                                                                     | 6  |
| SUPPORTIVE OS ANALYSES .....                                                                                                               | 7  |
| Two-stage accelerated failure time (AFT) model .....                                                                                       | 7  |
| Rank-preserving structural failure time (RPSFT) model .....                                                                                | 8  |
| Table 1. Study end points .....                                                                                                            | 9  |
| Table 2. Definition of analysis sets.....                                                                                                  | 12 |
| Table 3. Supportive OS analyses (ITT set).....                                                                                             | 13 |
| Table 4. Efficacy outcomes based on IRC assessment for patients by receipt of bridging therapy .....                                       | 14 |
| Table 5. Timing of crossover to receive liso-cel among patients in the SOC arm (ITT set).....                                              | 16 |
| Table 6. Demographics and disease characteristics of patients at time of crossover (crossover ITT set) .....                               | 17 |
| Table 7. Efficacy outcomes for patients in the crossover subgroup per investigator assessment (crossover efficacy set) .....               | 19 |
| Table 8. Grade 3–4 TEAEs (safety set).....                                                                                                 | 21 |
| Table 9. Summary of all deaths (safety set) .....                                                                                          | 23 |
| Table 10. TEAEs after CAR <sup>+</sup> T-cell infusion occurring in ≥10% of patients in the crossover subgroup (crossover safety set)..... | 24 |
| Table 11. CRS and NE in patients in the crossover subgroup (crossover safety set) .....                                                    | 25 |
| Table 12. Liso-cel cellular kinetic parameters by ddPCR in the liso-cel arm and crossover subgroup (cellular kinetic set).....             | 27 |
| Table 13. Persistence of the liso-cel transgene in the liso-cel arm (cellular kinetic set) .....                                           | 28 |
| Figure 1. Trial profile .....                                                                                                              | 29 |
| Figure 2. Selected subgroup analysis of event-free survival per IRC (ITT set) .....                                                        | 31 |
| REFERENCE.....                                                                                                                             | 33 |

**List of study sites**

| <b>Study site</b>                                                          | <b>City</b>   | <b>State/province/<br/>prefecture</b> | <b>Country</b> |
|----------------------------------------------------------------------------|---------------|---------------------------------------|----------------|
| Universitair Ziekenhuis Gent                                               | Gent          | Oost-Vlaanderen                       | Belgium        |
| Centre Hospitalier Lyon Sud                                                | Pierre-Bénite | Auvergne-Rhône-Alpes                  | France         |
| CHRU de Lille, Hôpital Claude Huriez                                       | Lille         | Hauts-de-France                       | France         |
| Gustave Roussy Cancer Center                                               | Villejuif     | Île-de-France                         | France         |
| Institut Paoli-Calmettes                                                   | Marseille     | Provence-Alpes-Côte d'Azur            | France         |
| Klinikum der Universität München                                           | München       | Bavaria                               | Germany        |
| Helios Klinikum Berlin-Buch                                                | Berlin        | Berlin                                | Germany        |
| Universitätsklinikum Hamburg-Eppendorf                                     | Hamburg       | Hamburg                               | Germany        |
| Universitätsklinikum Carl Gustav Carus Dresden                             | Dresden       | Sachsen                               | Germany        |
| A. O. U. Citta della Salute e della Scienza di Torino                      | Torino        | Torino                                | Italy          |
| Istituto Clinico Humanitas                                                 | Rozzano       | Milan                                 | Italy          |
| National Cancer Center Hospital                                            | Tokyo         | Tokyo                                 | Japan          |
| Tokyo Metropolitan Cancer and Infectious Diseases Center Komagome Hospital | Tokyo         | Tokyo                                 | Japan          |
| Toranomon Hospital                                                         | Tokyo         | Tokyo                                 | Japan          |
| Osaka City University Hospital                                             | Osaka-City    | Osaka                                 | Japan          |
| Erasmus Medical Center                                                     | Rotterdam     | —                                     | Netherlands    |
| Hospital Clínic i Provincial de Barcelona                                  | Barcelona     | Catalonia                             | Spain          |
| Hospital Universitario 12 de Octubre                                       | Madrid        | Madrid                                | Spain          |

| <b>Study site</b>                                                                  | <b>City</b>   | <b>State/province/<br/>prefecture</b> | <b>Country</b>    |
|------------------------------------------------------------------------------------|---------------|---------------------------------------|-------------------|
| Karolinska University Hospital                                                     | Stockholm     | Södermanland<br>and Uppland           | Sweden            |
| Medical Oncology, Inselspital,<br>University Hospital Bern                         | Bern          | Bern                                  | Switzerland       |
| University College London<br>Hospitals                                             | London        | —                                     | United<br>Kingdom |
| Somers Cancer Research<br>Building MP824 University<br>Hospital                    | Southampton   | —                                     | United<br>Kingdom |
| Mayo Clinic Hospital – Arizona                                                     | Phoenix       | Arizona                               | United States     |
| Virginia G. Piper Cancer Center<br>– HonorHealth Research<br>Institute             | Scottsdale    | Arizona                               | United States     |
| UCSF Medical Center                                                                | San Francisco | California                            | United States     |
| UCHealth University of<br>Colorado Hospital                                        | Aurora        | Colorado                              | United States     |
| Moffitt Cancer Center                                                              | Tampa         | Florida                               | United States     |
| Northside Hospital                                                                 | Atlanta       | Georgia                               | United States     |
| Winship Cancer Institute –<br>Emory Bone Marrow and Stem<br>Cell Transplant Center | Atlanta       | Georgia                               | United States     |
| UPMC Hillman Cancer Center                                                         | Pittsburgh    | Pennsylvania                          | United States     |
| Beth Israel Deaconess Medical<br>Center                                            | Boston        | Massachusetts                         | United States     |
| Massachusetts General<br>Hospital                                                  | Boston        | Massachusetts                         | United States     |
| John Theurer Cancer Center at<br>Hackensack University Medical<br>Center           | Hackensack    | New Jersey                            | United States     |
| Barbara Ann Karmanos Cancer<br>Institute                                           | Detroit       | Michigan                              | United States     |

| <b>Study site</b>                                                           | <b>City</b>   | <b>State/province/<br/>prefecture</b> | <b>Country</b> |
|-----------------------------------------------------------------------------|---------------|---------------------------------------|----------------|
| University of Michigan Health System                                        | Ann Arbor     | Michigan                              | United States  |
| University of Minnesota                                                     | Minneapolis   | Minnesota                             | United States  |
| Mayo Clinic – Rochester                                                     | Rochester     | Minnesota                             | United States  |
| University of Nebraska Medical Center, Peggy D. Cowdery Patient Care Center | Omaha         | Nebraska                              | United States  |
| Northwestern University Feinberg School of Medicine                         | Chicago       | Illinois                              | United States  |
| Roswell Park Cancer Institute                                               | Buffalo       | New York                              | United States  |
| Memorial Sloan Kettering Cancer Center                                      | New York      | New York                              | United States  |
| University of Oklahoma Peggy and Charles Stephenson Cancer Center           | Oklahoma City | Oklahoma                              | United States  |
| Oregon Health & Science University                                          | Portland      | Oregon                                | United States  |
| Baylor University Medical Center                                            | Dallas        | Texas                                 | United States  |
| The University of Texas MD Anderson Cancer Center                           | Houston       | Texas                                 | United States  |
| Virginia Commonwealth University                                            | Richmond      | Virginia                              | United States  |
| Fred Hutchinson Cancer Research Center                                      | Seattle       | Washington                            | United States  |

## STATISTICAL ANALYSES

### Hierarchical testing strategy

To control for multiplicity, a hierarchical testing strategy was used for the primary (event-free survival [EFS]) and key secondary (complete response [CR] rate, progression-free survival [PFS], and overall survival [OS]) end points to control for type I error rate. For the primary analysis, the primary efficacy end point of EFS was presented descriptively (ie, not included in the hierarchical testing strategy), as a statistically significant improvement was demonstrated in the lisocabtagene maraleucel (liso-cel) arm compared with the standard of care (SOC) arm at the interim analysis. At the time of the prespecified interim analysis, the null hypothesis on OS was not rejected. As described in the statistical analysis plan, all key secondary end points were to be retested at the primary analysis if the null hypothesis was not rejected for any one of them at the interim analysis. Therefore, hypothesis testing on CR rate, PFS, and OS was to be performed hierarchically for the primary analysis. The significance threshold to reject the null hypothesis for the key secondary end points was  $\leq 0.021$  at the primary analysis (per O'Brien-Fleming boundary alpha spending function).

The primary analysis was conducted when 115 EFS events were accrued, out of the 119 targeted by the protocol, corresponding to the 96.6% of the information fraction. The stopping boundaries for efficacy were then revised accordingly based on the actual number for EFS events available for analysis.

### SUBGROUP ANALYSES

The following variables (collected at baseline, unless otherwise specified) were considered in subgroup analyses:

- Secondary age-adjusted International Prognostic Index status: 0 or 1 versus 2 or 3
- Prior response status: refractory versus relapse to last prior therapy. The status is refractory if a patient achieved progressive disease (PD), stable disease (SD), partial response, or CR with relapse within 3 months to last prior therapy; otherwise, the status is relapsed
- Age: <65,  $\geq 65$  to <75, and  $\geq 75$  years at the time of randomization
- Sex: male versus female
- Ethnicity: Hispanic or Latino versus not Hispanic or Latino

- Region: Europe, United States, and Japan
- Race: White versus other races
- Eastern Cooperative Oncology Group performance status at screening: 0 and 1
- Sum of the product of perpendicular diameters:  $>50 \text{ cm}^2$  or  $\leq 50 \text{ cm}^2$
- Lactate dehydrogenase:  $<500 \text{ unit/L}$  or  $\geq 500 \text{ unit/L}$
- Prior chemotherapy response status: chemotherapy refractory versus chemotherapy sensitive to last therapy. The status is chemotherapy refractory if a patient achieved SD or PD to last chemotherapy-containing regimen; otherwise, the status is chemotherapy sensitive
- Central nervous system (CNS) disease status: known CNS disease versus no known CNS disease at the time of randomization
- Histological and molecular subtype:
  - Non-Hodgkin lymphoma (NHL) type: diffuse large B-cell lymphoma (DLBCL), follicular lymphoma grade 3B, high grade B-cell lymphoma with DLBCL histology, primary mediastinal B-cell lymphoma, or T-cell/histiocyte-rich large B-cell lymphoma
  - DLBCL subtype: DLBCL not otherwise specified de novo or DLBCL from transformed indolent NHL
  - DLBCL subtype based on cell of origin: germinal center B cell (GCB) or activated B cell, or non-GCB
  - NHL subtype based on chromosomal translocation: double-hit or triple-hit lymphoma versus non-double-hit or triple-hit lymphoma
- Bridging therapy status: impact of bridging therapy treatment effect versus SOC will be evaluated in patients receiving bridging therapy

## SUPPORTIVE OS ANALYSES

### Two-stage accelerated failure time (AFT) model

The 2-stage AFT model aimed to address the challenge of crossover by estimating the counterfactual survival times that would have been observed in the absence of crossover. For the TRANSFORM study, this method was implemented in 2 steps. In step 1, the acceleration factor associated with crossover (ie, the amount by which liso-cel was expected to increase a crossover patient's survival time) was estimated using a Weibull AFT model, controlling for

baseline and secondary baseline patient information. Specifically, secondary baseline information for crossover was assessed at or soon after confirmation of an EFS event. Baseline covariates included in the model were as follows: age, secondary age-adjusted International Prognostic Index (0 and 1 vs 2 and 3), best response on first line of treatment (relapse vs refractory), NHL type, CNS involvement, Ann Arbor stage, bone marrow involvement, presence of B-symptoms, and prior chemotherapy response status (chemotherapy refractory vs chemotherapy sensitive). Secondary baseline covariates were as follows: Eastern Cooperative Oncology Group performance status, hematology (hemoglobin, leukocytes, platelets, absolute lymphocytes, and absolute neutrophils), coagulation (fibrinogen), chemistry (lactate dehydrogenase), and inflammatory markers (ferritin, C-reactive protein). Baseline and secondary baseline covariates were selected based on clinical review. In step 2, counterfactual survival times for crossover patients were derived by shrinking their observed survival times according to the acceleration factor calculated in step 1. Once the counterfactual survival times of the SOC patients were obtained, these were compared with the observed survival times of liso-cel using a Cox proportional hazards regression model to derive the hazard ratio. Kaplan-Meier product limit was used to provide summary information and 95% confidence intervals, and OS rates were computed using Greenwood's formula.

### **Rank-preserving structural failure time (RPSFT) model**

Similar to the 2-stage AFT model, the RPSFT model derived counterfactual survival times for crossovers to be compared with the liso-cel arm. In the TRANSFORM study, counterfactual survival times were derived through the time spent "off" liso-cel, the time spent "on" liso-cel, and the acceleration factor associated with crossover (ie, the amount by which liso-cel was expected to increase a crossover patient's survival time). The acceleration factor was derived by a process called g-estimation and was used to shrink survival times for crossovers in order to derive their counterfactual estimates. These counterfactual survival times were then compared with observed survival times of liso-cel using a Cox proportional hazards regression model to derive the hazard ratio. Kaplan-Meier product limit was used to provide summary information and 95% confidence intervals, and OS rates were computed using Greenwood's formula.



**Table 1. Study end points**

| <b>End point type</b> | <b>End point</b>                      | <b>Description</b>                                                                                                                                                                                       | <b>Time frame</b>                |
|-----------------------|---------------------------------------|----------------------------------------------------------------------------------------------------------------------------------------------------------------------------------------------------------|----------------------------------|
| Primary               |                                       |                                                                                                                                                                                                          |                                  |
|                       | EFS                                   | Time from randomization to death from any cause, PD, failure to achieve CR or PR by 9 weeks post randomization,* or start of new antineoplastic therapy due to efficacy concerns, whichever occurs first | Up to 3 years post randomization |
| Key secondary         |                                       |                                                                                                                                                                                                          |                                  |
|                       | CR rate                               | Percentage of patients achieving a CR                                                                                                                                                                    | Up to 3 years post randomization |
|                       | PFS                                   | Time from randomization to PD or death from any cause, whichever occurs first                                                                                                                            | Up to 3 years post randomization |
|                       | OS                                    | Time from randomization to time of death due to any cause                                                                                                                                                | Up to last patient last visit    |
| Secondary             |                                       |                                                                                                                                                                                                          |                                  |
|                       | ORR                                   | Percentage of patients achieving an objective response of PR or better                                                                                                                                   | Up to 3 years post randomization |
|                       | DOR                                   | Time from first response to disease progression, start of new antineoplastic therapy due to efficacy concerns or death from any cause                                                                    | Up to 3 years post randomization |
|                       | PFS on next line of treatment (PFS-2) | Time from randomization to second objective disease progression or death from any cause, whichever occurs first                                                                                          | Up to 3 years post randomization |

|  |                                                         |                                                                                                                                                                                                                                                                                       |                                                |
|--|---------------------------------------------------------|---------------------------------------------------------------------------------------------------------------------------------------------------------------------------------------------------------------------------------------------------------------------------------------|------------------------------------------------|
|  | EFS rate                                                | Percentage of patients free of any EFS event at fixed time points                                                                                                                                                                                                                     | At 6, 12, 24, and 36 months post randomization |
|  | PFS rate                                                | Percentage of patients free of any PFS event at fixed time points                                                                                                                                                                                                                     | At 6, 12, 24, and 36 months post randomization |
|  | OS rate                                                 | Percentage of patients alive at fixed time points                                                                                                                                                                                                                                     | At 6, 12, 24, and 36 months post randomization |
|  | Clinical, histological, and molecular subgroup analyses | Response rate, EFS, PFS, OS in clinical, histological, and molecular subgroups                                                                                                                                                                                                        | Up to 3 years post randomization               |
|  | Rate of HDCT completion                                 | Percentage of patients in SOC arm completing HDCT                                                                                                                                                                                                                                     | Up to 3 years post randomization               |
|  | Rate of HSCT completion                                 | Percentage of patients in SOC arm completing autologous HSCT                                                                                                                                                                                                                          | Up to 3 years post randomization               |
|  | Response rate post-HSCT                                 | Percentage of patients in response after undergoing autologous HSCT                                                                                                                                                                                                                   | At 3 months after autologous HSCT              |
|  | HRQOL (domains of interest)                             | HRQOL using the global health/QOL, fatigue, physical and cognitive functioning subscales of the European Organisation for Research and Treatment of Cancer–Quality of Life C30 Questionnaire, and the Functional Assessment of Cancer Therapy-Lymphoma “Additional concerns” Subscale | Up to 3 years post randomization               |

|             |                                                             |                                                                                                                                                                                         |                                      |
|-------------|-------------------------------------------------------------|-----------------------------------------------------------------------------------------------------------------------------------------------------------------------------------------|--------------------------------------|
|             | Hospital resource utilization                               | Frequency of hospitalizations, inpatient days, intensive care unit days, outpatient visits, and reasons for hospitalization                                                             | Up to 3 years post randomization     |
|             | Safety                                                      | Type, frequency, and severity of adverse events, serious adverse events, and laboratory abnormalities (overall and in clinical, histological, and molecular subgroups)                  | Up to 3 years post randomization     |
| Exploratory |                                                             |                                                                                                                                                                                         |                                      |
|             | Efficacy analyses for patients who crossed over to liso-cel | PFS, EFS, DOR, ORR, and CR rate for patients who crossed over to liso-cel                                                                                                               | Up to 1 year after liso-cel infusion |
|             | Efficacy analyses for patients who crossed over to liso-cel | OS for patients who crossed over to liso-cel                                                                                                                                            | Up to last patient, last visit       |
|             | Cellular kinetics                                           | Maximum expansion, time to maximum expansion, area under the curve, and other relevant cellular kinetic parameters of liso-cel as assessed by droplet digital polymerase chain reaction | Up to 3 years post randomization     |

CR, complete response; DOR, duration of response; EFS, event-free survival; HDCT, high-dose chemotherapy; HRQOL, health-related quality of life; HSCT, hematopoietic stem cell transplantation; IRC, independent review committee; liso-cel, lisocabtagene maraleucel; ORR, overall response rate; OS, overall survival; PD, progressive disease; PFS, progression-free survival; PR, partial response; SOC, standard of care.

\*Failure to achieve CR or PR was evaluated after 3 cycles of platinum-based immunochemotherapy for the SOC arm (expected 9 weeks post randomization) and 5 weeks after the infusion for the liso-cel arm.

**Table 2. Definition of analysis sets**

| <b>Analysis set</b>    | <b>Definition</b>                                                                                                                                                          |
|------------------------|----------------------------------------------------------------------------------------------------------------------------------------------------------------------------|
| Screened set           | All patients who underwent screening                                                                                                                                       |
| ITT set                | All patients randomized to a treatment arm. This set was utilized in efficacy analyses                                                                                     |
| Safety set             | All randomized patients who received at least one dose of study treatment.* This set was utilized in safety analyses                                                       |
| Cellular kinetic set   | All patients who received liso-cel who had both preinfusion and at least 1 postinfusion cellular kinetic measurement assessed by droplet digital polymerase chain reaction |
| Crossover ITT set      | All patients in the SOC arm who were approved for crossover to receive liso-cel                                                                                            |
| Crossover efficacy set | All patients in the SOC arm who were approved for crossover and received liso-cel infusion                                                                                 |
| Crossover safety set   | All patients in the SOC arm who were approved for crossover and received CAR T-cell therapy (liso-cel or nonconforming product)                                            |

CAR, chimeric antigen receptor; ITT, intention-to-treat; liso-cel, lisocabtagene maraleucel; SOC, standard of care.

\*In the liso-cel arm, study treatment included bridging therapy if needed, lymphodepleting chemotherapy, and liso-cel or nonconforming product (defined as any product wherein one of the CD8 or CD4 cell components did not meet one of the requirements to be considered liso-cel but was considered safe for infusion). In the SOC arm, study treatment included 3 cycles of platinum-based immunochemotherapy followed by high-dose chemotherapy and autologous stem cell transplantation in responding patients.

**Table 3. Supportive OS analyses (ITT set)**

|                                                      | <b>Liso-cel<br/>(n = 92)</b> | <b>SOC<br/>(n = 92)</b> |
|------------------------------------------------------|------------------------------|-------------------------|
| <b>Two-stage accelerated failure time model</b>      |                              |                         |
| Patients with events, n (%)                          | 28 (30)                      | 38 (41)                 |
| Median (95% CI) time to event, mo                    | NR (29.5–NR)                 | NR (8.1–NR)             |
| Stratified HR (95% CI)*                              | 0.415 (0.251–0.686)          |                         |
| 12-month OS rate, %                                  | 83.4                         | 54.1                    |
| Two-sided 95% CI†                                    | 75.7–91.1                    | 43.1–65.2               |
| 18-month OS rate, %                                  | 73.1                         | 54.1                    |
| Two-sided 95% CI†                                    | 63.9–82.3                    | 43.1–65.2               |
| <b>Rank-preserving structural failure time model</b> |                              |                         |
| Patients with events, n (%)                          | 28 (30)                      | 31 (34)                 |
| Median (95% CI) time to event, mo                    | NR (29.5–NR)                 | 11.4 (9.7–NR)           |
| Stratified HR (95% CI)*                              | 0.279 (0.145–0.537)          |                         |
| 12-month OS rate, %                                  | 83.4                         | 49.7                    |
| Two-sided 95% CI†                                    | 75.7–91.1                    | 30.7–68.8               |
| 18-month OS rate, %                                  | 73.1                         | NR                      |
| Two-sided 95% CI†                                    | 63.9–82.3                    | NR–NR                   |

CI, confidence interval; HR, hazard ratio; ITT, intention-to-treat; liso-cel, lisocabtagene maraleucel; NR, not reached; OS, overall survival; SOC, standard of care.

\*Based on a stratified Cox proportional hazards model.

†Greenwood's formula.

**Table 4. Efficacy outcomes based on IRC assessment for patients by receipt of bridging therapy**

|                                     | Liso-cel                                                       |                                                               |                                    |                   | SOC<br>(n = 92)  |
|-------------------------------------|----------------------------------------------------------------|---------------------------------------------------------------|------------------------------------|-------------------|------------------|
|                                     | PET-positive<br>disease after<br>bridging therapy<br>(n = 47)* | PET-negative<br>disease after<br>bridging therapy<br>(n = 9)† | No bridging<br>therapy<br>(n = 34) | Total<br>(n = 92) |                  |
| <b>Best overall response, n (%)</b> |                                                                |                                                               |                                    |                   |                  |
| Complete response                   | 34 (72)                                                        | 8 (89)                                                        | 25 (74)                            | 68 (74)           | 40 (43)          |
| Partial response                    | 7 (15)                                                         | 0                                                             | 5 (15)                             | 12 (13)           | 5 (5)            |
| Stable disease                      | 3 (6)                                                          | 0                                                             | 1 (3)                              | 4 (4)             | 20 (22)          |
| Progressive disease                 | 2 (4)                                                          | 1 (11)                                                        | 2 (6)                              | 6 (7)             | 24 (26)          |
| Nonevaluable                        | 1 (2)                                                          | 0                                                             | 1 (3)                              | 2 (2)             | 3 (3)            |
| <b>EFS</b>                          |                                                                |                                                               |                                    |                   |                  |
| Median (95% CI) EFS, mo‡            | NR (6.0–NR)                                                    | NR (2.2–NR)                                                   | 12.2 (5.9–NR)                      | NR (9.5–NR)       | 2.4 (2.2–4.9)    |
| 12-month EFS rate, % (95% CI)§      | 56.5 (42.2–70.8)                                               | 77.8 (50.6–100.0)                                             | 52.9 (36.2–69.7)                   | 57.1 (47.0–67.3)  | 22.5 (13.9–31.2) |
| 18-month EFS rate, % (95% CI)§      | 54.3 (39.8–68.7)                                               | 66.7 (35.9–97.5)                                              | 46.7 (29.8–63.6)                   | 52.6 (42.3–62.9)  | 20.8 (12.2–29.5) |
| <b>PFS</b>                          |                                                                |                                                               |                                    |                   |                  |
| Median (95% CI) PFS, mo‡            | NR (8.4–NR)                                                    | NR (2.2–NR)                                                   | NR (11.0–NR)                       | NR (12.6–NR)      | 6.2 (4.3–8.6)    |
| 12-month PFS rate, % (95% CI)§      | 60.9 (46.3–75.4)                                               | 77.8 (50.6–100.0)                                             | 62.5 (45.7–79.4)                   | 63.1 (53.0–73.3)  | 31.2 (20.2–42.3) |
| 18-month PFS rate, % (95% CI)§      | 58.4 (43.7–73.2)                                               | 66.7 (35.9–97.5)                                              | 55.6 (38.1–73.1)                   | 58.2 (47.7–68.7)  | 28.8 (17.7–40.0) |
| <b>OS</b>                           |                                                                |                                                               |                                    |                   |                  |
| Median (95% CI) OS, mo‡             | NR (22.2–NR)                                                   | 29.5 (5.9–NR)                                                 | NR (21.1–NR)                       | NR (29.5–NR)      | 29.9 (17.9–NR)   |
| 12-month OS rate, % (95% CI)§       | 82.4 (71.3–93.5)                                               | 88.9 (68.4–100.0)                                             | 85.3 (73.4–97.2)                   | 83.4 (75.7–91.1)  | 72.0 (62.7–81.3) |
| 18-month OS rate, % (95% CI)§       | 73.2 (60.1–86.2)                                               | 77.8 (50.6–100.0)                                             | 73.5 (58.7–88.4)                   | 73.1 (63.9–82.3)  | 60.6 (50.2–71.1) |

Two patients who received bridging therapy did not have the prelymphodepleting chemotherapy assessment.

CI, confidence interval; EFS, event-free survival; liso-cel, lisocabtagene maraleucel; IRC, independent review committee; NR, not reached; OS, overall survival; PET, positron emission tomography; PFS, progression-free survival.

\*Includes patients with PET-positive disease at prelymphodepleting chemotherapy assessment after receiving bridging therapy.

†Includes patients with PET-negative disease at prelymphodepleting chemotherapy assessment after receiving bridging therapy.

‡Median estimates of time to event were Kaplan-Meier product-limit estimates.

§Based on Greenwood's formula.

**Table 5. Timing of crossover to receive liso-cel among patients in the SOC arm (ITT set)**

| <b>Parameter</b>                                                     | <b>SOC<br/>(n = 92)</b> |
|----------------------------------------------------------------------|-------------------------|
| Patients approved for crossover to receive liso-cel, n (%)           | 61 (66)                 |
| <b>Patients by timing of crossover approval*</b>                     |                         |
| Before completion of SOC cycle 1                                     | 0                       |
| After completion of SOC cycle 1 and before completion of SOC cycle 2 | 5 (8)                   |
| After completion of SOC cycle 2 and before completion of SOC cycle 3 | 13 (21)                 |
| After completion of SOC cycle 3 and before HDCT/ASCT                 | 22 (36)                 |
| After HDCT/ASCT                                                      | 21 (34)                 |

ASCT, autologous stem cell transplantation; HDCT, high-dose chemotherapy; ITT, intention-to-treat; liso-cel, lisocabtagene maraleucel; SOC, standard of care.

\*Percentages are based on the number of patients approved for crossover to liso-cel treatment.



**Table 6. Demographics and disease characteristics of patients at time of crossover (crossover ITT set)**

| <b>Characteristic</b>                                                                    | <b>Crossover subgroup<br/>(n = 61)</b> |
|------------------------------------------------------------------------------------------|----------------------------------------|
| Male sex, n (%)                                                                          | 41 (67)                                |
| <b>Age, y, n (%)</b>                                                                     |                                        |
| Median (range)                                                                           | 60.0 (29–75)                           |
| <65                                                                                      | 43 (70)                                |
| ≥65 to <75                                                                               | 16 (26)                                |
| 75                                                                                       | 2 (3)                                  |
| <b>Large B-cell lymphoma subtypes, n (%)</b>                                             |                                        |
| Diffuse LBCL NOS                                                                         | 33 (54)                                |
| Diffuse LBCL transformed from indolent lymphomas                                         | 6 (10)                                 |
| FL grade 3B                                                                              | 0                                      |
| HGBCL with gene rearrangements in <i>MYC</i> and <i>BCL2</i> , <i>BCL6</i> ,<br>or both* | 15 (25)                                |
| Double-hit rearrangements                                                                | 10 (16)                                |
| Triple-hit rearrangements                                                                | 4 (7)                                  |
| PMBCL                                                                                    | 6 (10)                                 |
| THRBCL                                                                                   | 1 (2)                                  |
| <b>ECOG PS at time of crossover, n (%)</b>                                               |                                        |
| 0                                                                                        | 25 (41)                                |
| 1                                                                                        | 35 (57)                                |
| 2                                                                                        | 1 (2)                                  |
| Median (range) CrCl at time of crossover, mL/min                                         | 99.6 (43.8–246.6)                      |
| Median (range) LVEF at time of crossover, %                                              | 60 (39–71)                             |
| Secondary CNS lymphoma, n (%)                                                            | 3 (5)                                  |
| <b>Best response to first-line therapy, n (%)</b>                                        |                                        |
| CR                                                                                       | 19 (31)                                |
| PR                                                                                       | 30 (49)                                |
| SD                                                                                       | 2 (3)                                  |
| PD                                                                                       | 10 (16)                                |
| Not evaluable                                                                            | 0                                      |

CNS, central nervous system; CR, complete response; CrCl, creatinine clearance; ECOG PS, Eastern Cooperative Oncology Group performance status; FL, follicular lymphoma; HGBCL, high-grade B-cell lymphoma; ITT, intention-to-treat; LBCL, large B-cell lymphoma; liso-cel, lisocabtagene maraleucel; LVEF, left ventricular ejection fraction; NOS, not otherwise specified; PD, progressive disease; PMBCL, primary mediastinal B-cell lymphoma; PR, partial response; SD, stable disease; THRBCL, T-cell/histiocyte-rich large B-cell lymphoma.

\*FISH results were assessed locally but subsequently confirmed by a central lab.

**Table 7. Efficacy outcomes for patients in the crossover subgroup per investigator assessment (crossover efficacy set)**

| <b>Efficacy end point</b>            | <b>Crossover subgroup<br/>(n = 57)*</b> |
|--------------------------------------|-----------------------------------------|
| Median (range) follow-up, mo†        | 12.0 (1.4–28.1)                         |
| <b>EFS</b>                           |                                         |
| Patients with events, n (%)          | 33 (58)                                 |
| Median (95% CI) EFS, mo‡             | 5.9 (3.1–15.1)                          |
| 12-month EFS rate, % (95% CI)§       | 45.2 (31.6–58.8)                        |
| <b>Overall response rate, n (%)</b>  | 35 (61)                                 |
| Two-sided 95% CI                     | 47.6–74.0                               |
| <b>Complete response rate, n (%)</b> | 30 (53)                                 |
| Two-sided 95% CI                     | 39.0–66.0                               |
| <b>Best overall response, n (%)</b>  |                                         |
| Complete response                    | 30 (53)                                 |
| Partial response                     | 5 (9)                                   |
| Stable disease                       | 1 (2)                                   |
| Progressive disease                  | 18 (32)                                 |
| Nonevaluable                         | 3 (5)                                   |
| <b>PFS</b>                           |                                         |
| Patients with events, n (%)          | 31 (54)                                 |
| Median (95% CI) PFS, mo‡             | 5.9 (3.2–26.5)                          |
| 12-month PFS rate, % (95% CI)§       | 46.9 (33.0–60.7)                        |
| <b>OS</b>                            |                                         |
| Patients with events, n (%)          | 28 (49)                                 |
| Median (95% CI) time to event, mo    | 15.8 (11.8–NR)                          |
| 12-month OS rate, % (95% CI)§        | 63.1 (50.1–76.0)                        |
| <b>Duration of response</b>          |                                         |
| Patients with events, n (%)          | 11 (19)                                 |
| Median (95% CI) DOR, mo‡             | 13.7 (9.4–23.5)                         |
| <b>Duration of CR</b>                |                                         |
| Patients with events, n (%)          | 8 (14)                                  |
| Median (95% CI) DOR, mo‡             | 13.7 (13.7–20.5)                        |

All end points were evaluated from the time of liso-cel infusion.

CAR, chimeric antigen receptor; CI, confidence interval; DOR, duration of response; EFS, event-free survival; IRC, independent review committee; liso-cel, lisocabtagene maraleucel; OS, overall survival; PFS, progression-free survival; SOC, standard of care.

\*Three patients approved for crossover did not receive liso-cel and 1 patient received nonconforming product and were not included in the efficacy analyses.

†Includes all patients randomized to the SOC arm who were approved for crossover and received CAR T-cell therapy (n = 57).

‡Median estimates of time to event were Kaplan-Meier product-limit estimates.

§Based on Greenwood's formula.

**Table 8. Grade 3–4 TEAEs (safety set)**

| <b>TEAE</b>                                         | <b>Liso-cel<br/>(n = 92)</b> | <b>SOC<br/>(n = 91)</b> |
|-----------------------------------------------------|------------------------------|-------------------------|
| Patients with ≥1 grade 3–4 TEAE                     | 85 (92)                      | 81 (89)                 |
| <b>Grade 3–4 TEAEs occurring in ≥2% of patients</b> |                              |                         |
| Neutropenia                                         | 75 (82)                      | 47 (52)                 |
| Anemia                                              | 48 (52)                      | 51 (56)                 |
| Thrombocytopenia                                    | 46 (50)                      | 62 (68)                 |
| Lymphopenia                                         | 24 (26)                      | 9 (10)                  |
| Leukopenia                                          | 15 (16)                      | 11 (12)                 |
| Febrile neutropenia                                 | 11 (12)                      | 21 (23)                 |
| Platelet count decreased                            | 7 (8)                        | 2 (2)                   |
| Neutrophil count decreased                          | 6 (7)                        | 0                       |
| Hypertension                                        | 5 (5)                        | 1 (1)                   |
| Headache                                            | 4 (4)                        | 1 (1)                   |
| Hypokalemia                                         | 4 (4)                        | 4 (4)                   |
| Hyponatremia                                        | 3 (3)                        | 2 (2)                   |
| Hypophosphatemia                                    | 3 (3)                        | 8 (9)                   |
| Hypotension                                         | 3 (3)                        | 0                       |
| Muscular weakness                                   | 3 (3)                        | 0                       |
| Nausea                                              | 3 (3)                        | 4 (4)                   |
| White blood cell count decreased                    | 3 (3)                        | 0                       |
| Abdominal pain                                      | 2 (2)                        | 1 (1)                   |
| Aphasia                                             | 2 (2)                        | 0                       |
| Bone marrow failure                                 | 2 (2)                        | 0                       |
| CD4 lymphocytes decreased                           | 2 (2)                        | 1 (1)                   |
| Constipation                                        | 2 (2)                        | 0                       |
| Hyperglycemia                                       | 2 (2)                        | 0                       |
| Infusion-related reaction                           | 2 (2)                        | 0                       |
| Pulmonary embolism                                  | 2 (2)                        | 1 (1)                   |
| Sepsis                                              | 2 (2)                        | 3 (3)                   |
| Syncope                                             | 2 (2)                        | 1 (1)                   |
| Acute kidney injury                                 | 1 (1)                        | 4 (4)                   |
| Alanine aminotransferase increased                  | 1 (1)                        | 2 (2)                   |

| <b>TEAE</b>                | <b>Liso-cel<br/>(n = 92)</b> | <b>SOC<br/>(n = 91)</b> |
|----------------------------|------------------------------|-------------------------|
| Back pain                  | 1 (1)                        | 2 (2)                   |
| Confusional state          | 1 (1)                        | 2 (2)                   |
| Decreased appetite         | 1 (1)                        | 4 (4)                   |
| Deep vein thrombosis       | 1 (1)                        | 2 (2)                   |
| Lymphocyte count decreased | 1 (1)                        | 2 (2)                   |
| Pain in extremity          | 1 (1)                        | 2 (2)                   |
| Pneumonia                  | 1 (1)                        | 2 (2)                   |
| Urinary tract infection    | 1 (1)                        | 2 (2)                   |
| Vomiting                   | 1 (1)                        | 2 (2)                   |
| Diarrhea                   | 0                            | 3 (3)                   |
| Electrolyte imbalance      | 0                            | 2 (2)                   |
| Fatigue                    | 0                            | 2 (2)                   |
| Hyperuricemia              | 0                            | 2 (2)                   |
| Mucosal inflammation       | 0                            | 4 (4)                   |
| Pain                       | 0                            | 2 (2)                   |
| Stomatitis                 | 0                            | 2 (2)                   |

A patient was counted only once for multiple events within a preferred term.

Liso-cel, lisocabtagene maraleucel; SOC, standard of care; TEAE, treatment-emergent adverse event.

**Table 9. Summary of all deaths (safety set)**

|                        | <b>Liso-cel<br/>(n = 92)</b> | <b>SOC<br/>(n = 91)</b> | <b>Crossover<br/>subgroup<br/>(n = 58)*</b> | <b>SOC +<br/>crossover<br/>subgroup<br/>(n = 91)</b> |
|------------------------|------------------------------|-------------------------|---------------------------------------------|------------------------------------------------------|
| <b>Deaths, n (%)</b>   | 28 (30)                      | 9 (10)                  | 29 (50)                                     | 38 (42)                                              |
| Disease progression    | 17 (18)                      | 4 (4)                   | 21 (36)                                     | 25 (27)                                              |
| Adverse event          | 4 (4)                        | 5 (5)                   | 0                                           | 5 (5)                                                |
| Other                  | 7 (8)                        | 0                       | 5 (9)                                       | 5 (5)                                                |
| Unknown cause of death | 0                            | 0                       | 3 (5)                                       | 3 (3)                                                |

Liso-cel, lisocabtagene maraleucel; SOC, standard of care.

\*Includes deaths that occurred after approval to receive liso-cel in patients randomized to the SOC arm who crossed over to receive liso-cel.

**Table 10. TEAEs after CAR<sup>+</sup> T-cell infusion occurring in ≥10% of patients in the crossover subgroup (crossover safety set)**

|                                     | <b>Crossover subgroup<br/>(n = 58)*</b> |
|-------------------------------------|-----------------------------------------|
| <b>Patients with ≥1 TEAE, n (%)</b> | 54 (93)                                 |
| Neutropenia                         | 31 (53)                                 |
| Cytokine release syndrome           | 27 (47)                                 |
| Anemia                              | 24 (41)                                 |
| Thrombocytopenia                    | 21 (36)                                 |
| Headache                            | 16 (28)                                 |
| Nausea                              | 14 (24)                                 |
| Fatigue                             | 12 (21)                                 |
| Constipation                        | 11 (19)                                 |
| Hypotension                         | 11 (19)                                 |
| Dizziness                           | 10 (17)                                 |
| Hypokalemia                         | 10 (17)                                 |
| Tremor                              | 10 (17)                                 |
| Diarrhea                            | 9 (16)                                  |
| Lymphopenia                         | 9 (16)                                  |
| Decreased appetite                  | 8 (14)                                  |
| Confusional state                   | 7 (12)                                  |
| Peripheral edema                    | 7 (12)                                  |
| Hypocalcemia                        | 6 (10)                                  |
| Pyrexia                             | 6 (10)                                  |
| Vomiting                            | 6 (10)                                  |

CAR, chimeric antigen receptor; liso-cel, lisocabtagene maraleucel; TEAE, treatment-emergent adverse event.

\*Of 61 patients approved for crossover, 3 did not receive CAR<sup>+</sup> T-cell infusion; the crossover safety set includes 57 patients who received liso-cel infusion and 1 who received nonconforming product.



**Table 11. CRS and NE in patients in the crossover subgroup (crossover safety set)**

|                                                     | <b>Crossover subgroup<br/>(n = 58)*</b> |
|-----------------------------------------------------|-----------------------------------------|
| <b>Patients with CRS,† n (%)</b>                    |                                         |
| Any grade                                           | 27 (47)                                 |
| Grade 1                                             | 19 (33)                                 |
| Grade 2                                             | 7 (12)                                  |
| Grade 3                                             | 0                                       |
| Grade 4                                             | 1 (2)                                   |
| Grade 5                                             | 0                                       |
| Median (range) time to onset, d                     | 3.0 (1–8)                               |
| Median (range) time to resolution, d                | 6.0 (1–14)                              |
| <b>Patients with NEs‡ n (%)</b>                     |                                         |
| Any grade                                           | 11 (19)                                 |
| Grade 1                                             | 4 (7)                                   |
| Grade 2                                             | 5 (9)                                   |
| Grade 3                                             | 1 (2)                                   |
| Grade 4                                             | 1 (2)                                   |
| Grade 5                                             | 0                                       |
| Median (range) time to onset, d                     | 8.0 (2–21)                              |
| Median (range) time to resolution, d                | 11.0 (2–48)                             |
| <b>Clinical management of CRS and/or NEs, n (%)</b> |                                         |
| Tocilizumab, corticosteroids, or both               |                                         |
| Tocilizumab and/or corticosteroids                  | 22 (38)                                 |
| Tocilizumab only                                    | 9 (16)                                  |
| Tocilizumab and corticosteroids                     | 10 (17)                                 |
| Corticosteroids only                                | 3 (5)                                   |
| Vasopressors                                        | 1 (2)                                   |

CAR, chimeric antigen receptor; CRS, cytokine release syndrome; liso-cel, lisocabtagene maraleucel; NE, neurological event.

\*Of 61 patients approved for crossover, 3 did not receive CAR<sup>+</sup> T-cell infusion; the crossover safety set includes 57 patients who received liso-cel infusion and 1 who received nonconforming product.

†Graded according to the Lee 2014 criteria.<sup>1</sup>

‡Defined as investigator-identified neurological adverse events related to liso-cel and graded using the National Cancer Institute Common Terminology Criteria for Adverse Events, version 4.03.

**Table 12. Liso-cel cellular kinetic parameters by ddPCR in the liso-cel arm and crossover subgroup (cellular kinetic set)**

| <b>Parameter</b>                          | <b>Liso-cel<br/>(n = 87)</b> | <b>Crossover subgroup<br/>(n = 56)</b> |
|-------------------------------------------|------------------------------|----------------------------------------|
| <b>C<sub>max</sub>, copies/μg</b>         |                              |                                        |
| Number of patients                        | 84                           | 52                                     |
| Median                                    | 33,285                       | 33,258                                 |
| IQR                                       | 13,848–94,913                | 10,690–73,053                          |
| Range                                     | 549–475,991                  | 143–454,083.5                          |
| <b>t<sub>max</sub>, day</b>               |                              |                                        |
| Number of patients                        | 84                           | 52                                     |
| Median                                    | 10                           | 10                                     |
| IQR                                       | 9–11                         | 8.5–14                                 |
| Range                                     | 6–22                         | 6–28                                   |
| <b>AUC<sub>0–28d</sub>, day*copies/μg</b> |                              |                                        |
| Number of patients                        | 84                           | 52                                     |
| Median                                    | 268,911                      | 305,970                                |
| IQR                                       | 114,626–779,701              | 124,621–804,128                        |
| Range                                     | 5158–4,836,898.5             | 2255–5,999,122                         |

AUC<sub>0–28d</sub>, area under the curve from 0 to 28 days postinfusion; C<sub>max</sub>, maximum expansion; ddPCR, droplet digital polymerase chain reaction; IQR, interquartile range; liso-cel, lisocabtagene maraleucel; t<sub>max</sub>, time to maximum expansion.

Noncompartmental cellular kinetic parameters were calculated for patients who had a quantifiable cellular kinetic measurement ≥28 days after infusion. Noncompartmental parameters were not calculated in the following cases: 1) if there were less than 2 quantifiable cellular kinetic measurements up to 28 days after infusion; or 2) if all cellular kinetic measurements were below the limit of detection.

**Table 13. Persistence of the liso-cel transgene in the liso-cel arm (cellular kinetic set)**

| <b>Patients at time point*</b> | <b>Liso-cel</b> |
|--------------------------------|-----------------|
| 35 days postinfusion           | 61/67 (91%)     |
| 42 days postinfusion           | 53/62 (85%)     |
| 2 months postinfusion          | 47/68 (69%)     |
| 3 months postinfusion          | 41/70 (59%)     |
| 5 months postinfusion          | 30/61 (49%)     |
| 8 months postinfusion          | 22/49 (45%)     |
| 11 months postinfusion         | 19/44 (43%)     |
| 17 months postinfusion         | 11/34 (32%)     |
| 23 months postinfusion         | 5/15 (33%)      |

Liso-cel, lisocabtagene maraleucel.

\*Number of patients with persistence of liso-cel in the blood/number of patients with an available sample at the specific time point. Percentage is 100 times n divided by N. Persistence was defined as a transgene count greater than or equal to the lower limit of detection (40 copies/ $\mu$ g). Data obtained after the start of a new anticancer therapy were not included in the determination of persistence.

Figure 1. Trial profile

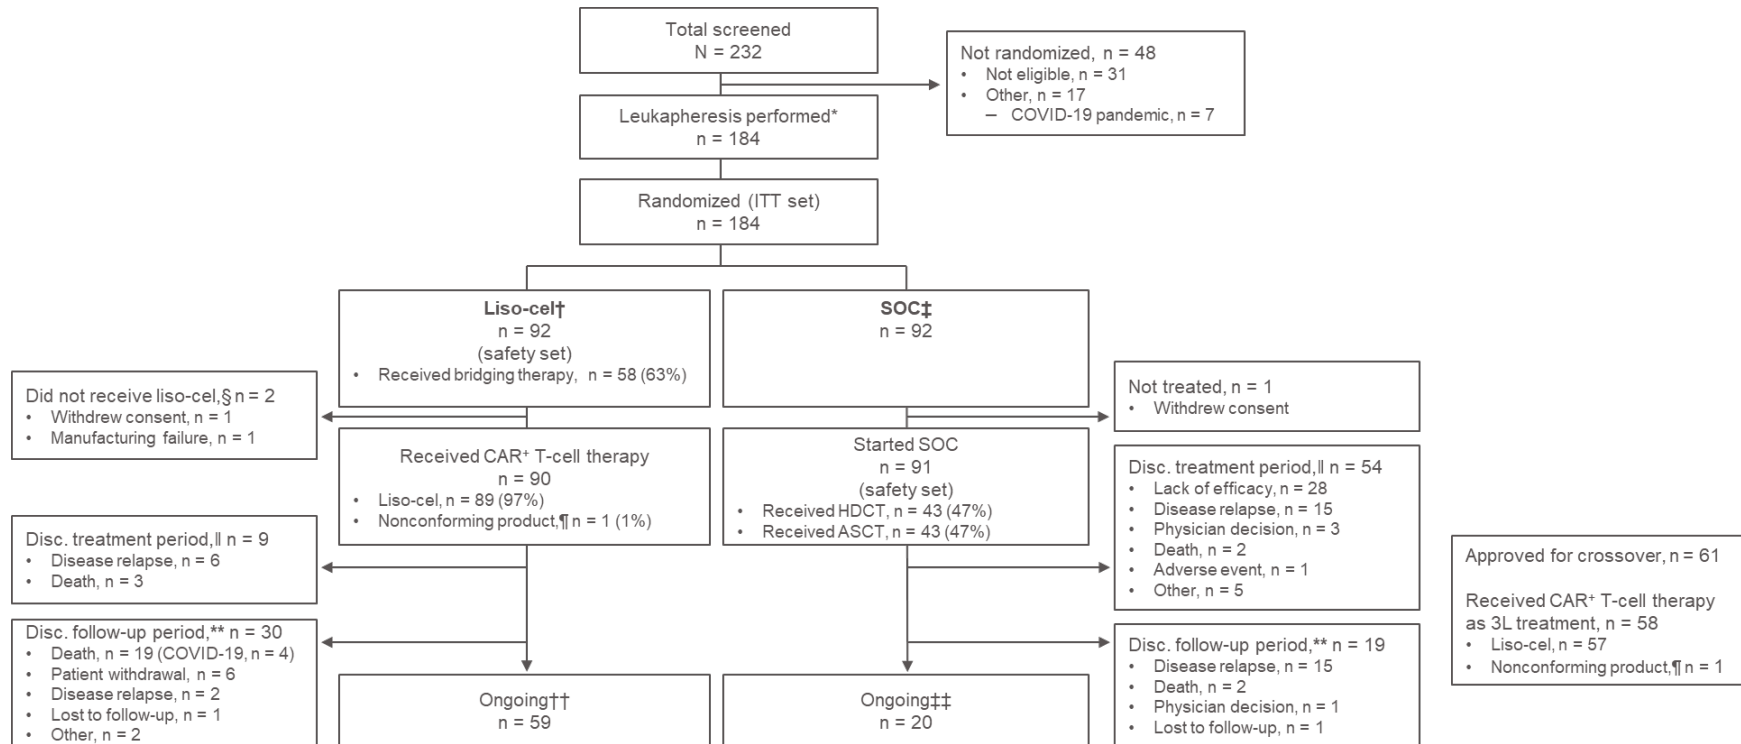

3L, third line; ASCT, autologous stem cell transplantation; CAR, chimeric antigen receptor; disc., discontinued; HDCT, high-dose chemotherapy; ITT, intention-to-treat; LDC, lymphodepleting chemotherapy; SOC, standard of care.

\*During screening, patients were assessed for eligibility, underwent unstimulated leukapheresis, and subsequent randomization.

†Patients received LDC followed by liso-cel infusion; bridging therapy was allowed per protocol.

‡Patients received 3 cycles of SOC platinum-based immunochemotherapy (see Methods for details) followed by HDCT and ASCT.

§Patients received bridging therapies and, therefore, were included in the safety set.

¶¶Nonconforming product was defined as any product wherein one of the CD8 or CD4 cell components did not meet one of the requirements to be considered liso-cel but was considered safe for infusion.

¶¶Patients could discontinue the treatment period, defined as the period from randomization to week 18, but continue to be followed up for OS.

\*\*Patients could discontinue the follow-up period, defined as the period from week 18 to month 36, but continue to be followed up for OS.

††Six patients who discontinued the treatment period remained in the study follow-up period.

‡‡One patient who discontinued the treatment period remained in the study follow-up period.

**Figure 2. Selected subgroup analysis of event-free survival per IRC (ITT set)**

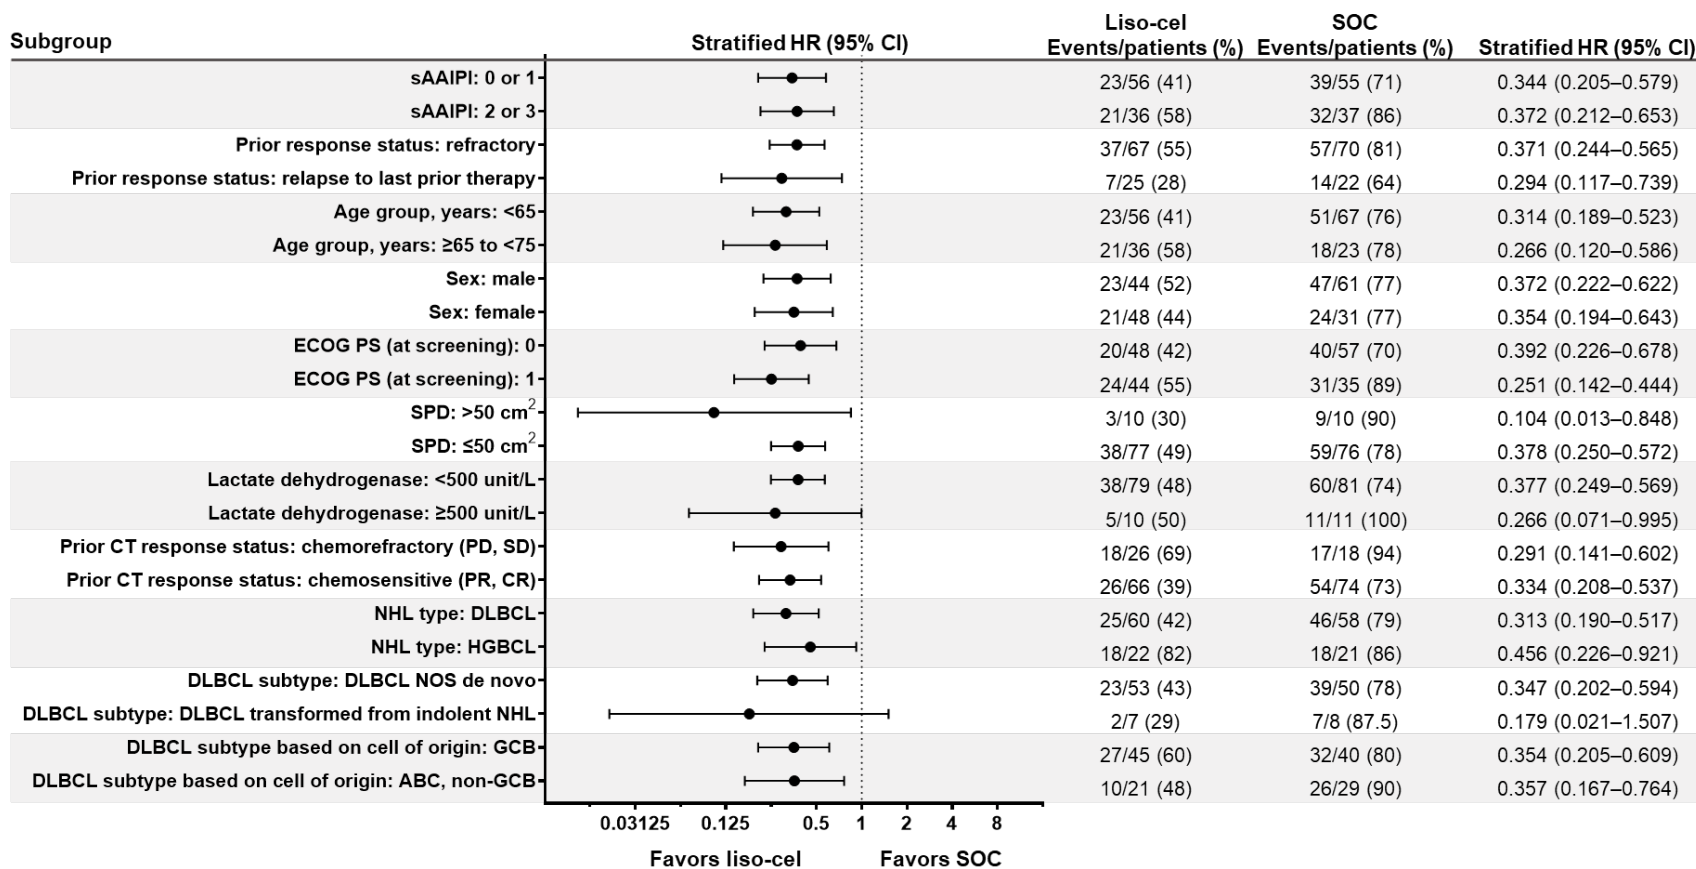

Kaplan-Meier estimates of event-free survival (primary end point) per IRC. Event-free survival was defined as the time from randomization to death from any cause, PD, not achieving a CR or PR by 9 weeks post randomization, or start of a new antineoplastic therapy due to efficacy concerns, whichever occurred first.

ABC, activated B cell; CI, confidence interval; CNS, central nervous system; CR, complete response; CT, chemotherapy; DLBCL, diffuse large B-cell lymphoma; ECOG, Eastern Cooperative Oncology Group; GCB, germinal center B cell; HGBCL, high-grade B-cell lymphoma; HR, hazard ratio; IRC, independent review committee; ITT, intention-to-treat; liso-cel, lisocabtagene maraleucel; NHL, non-Hodgkin lymphoma; NOS, not otherwise specified; PD, progressive disease; PR, partial response; sAAIPI, secondary age-adjusted International Prognostic Index; SD, stable disease; SOC, standard of care; SPD, sum of the product of perpendicular diameters.



**REFERENCE**

1. Lee DW, Gardner R, Porter DL, et al. Current concepts in the diagnosis and management of cytokine release syndrome. *Blood*. 2014;124(2):188-195.
